# Supplementary material for: A Semi-Supervised Approach for Refining Transcriptional Signatures of Drug Response and Repositioning Predictions
Source: PubMed Central journal article supplement (PMC4599732; doi:10.1371/journal.pone.0139446), 2015-10-09

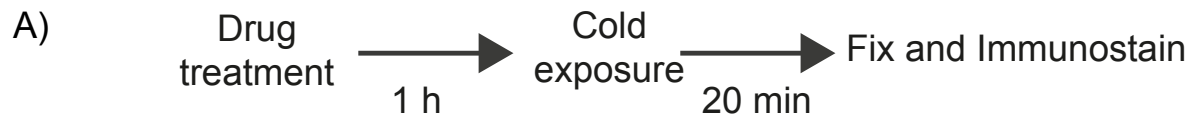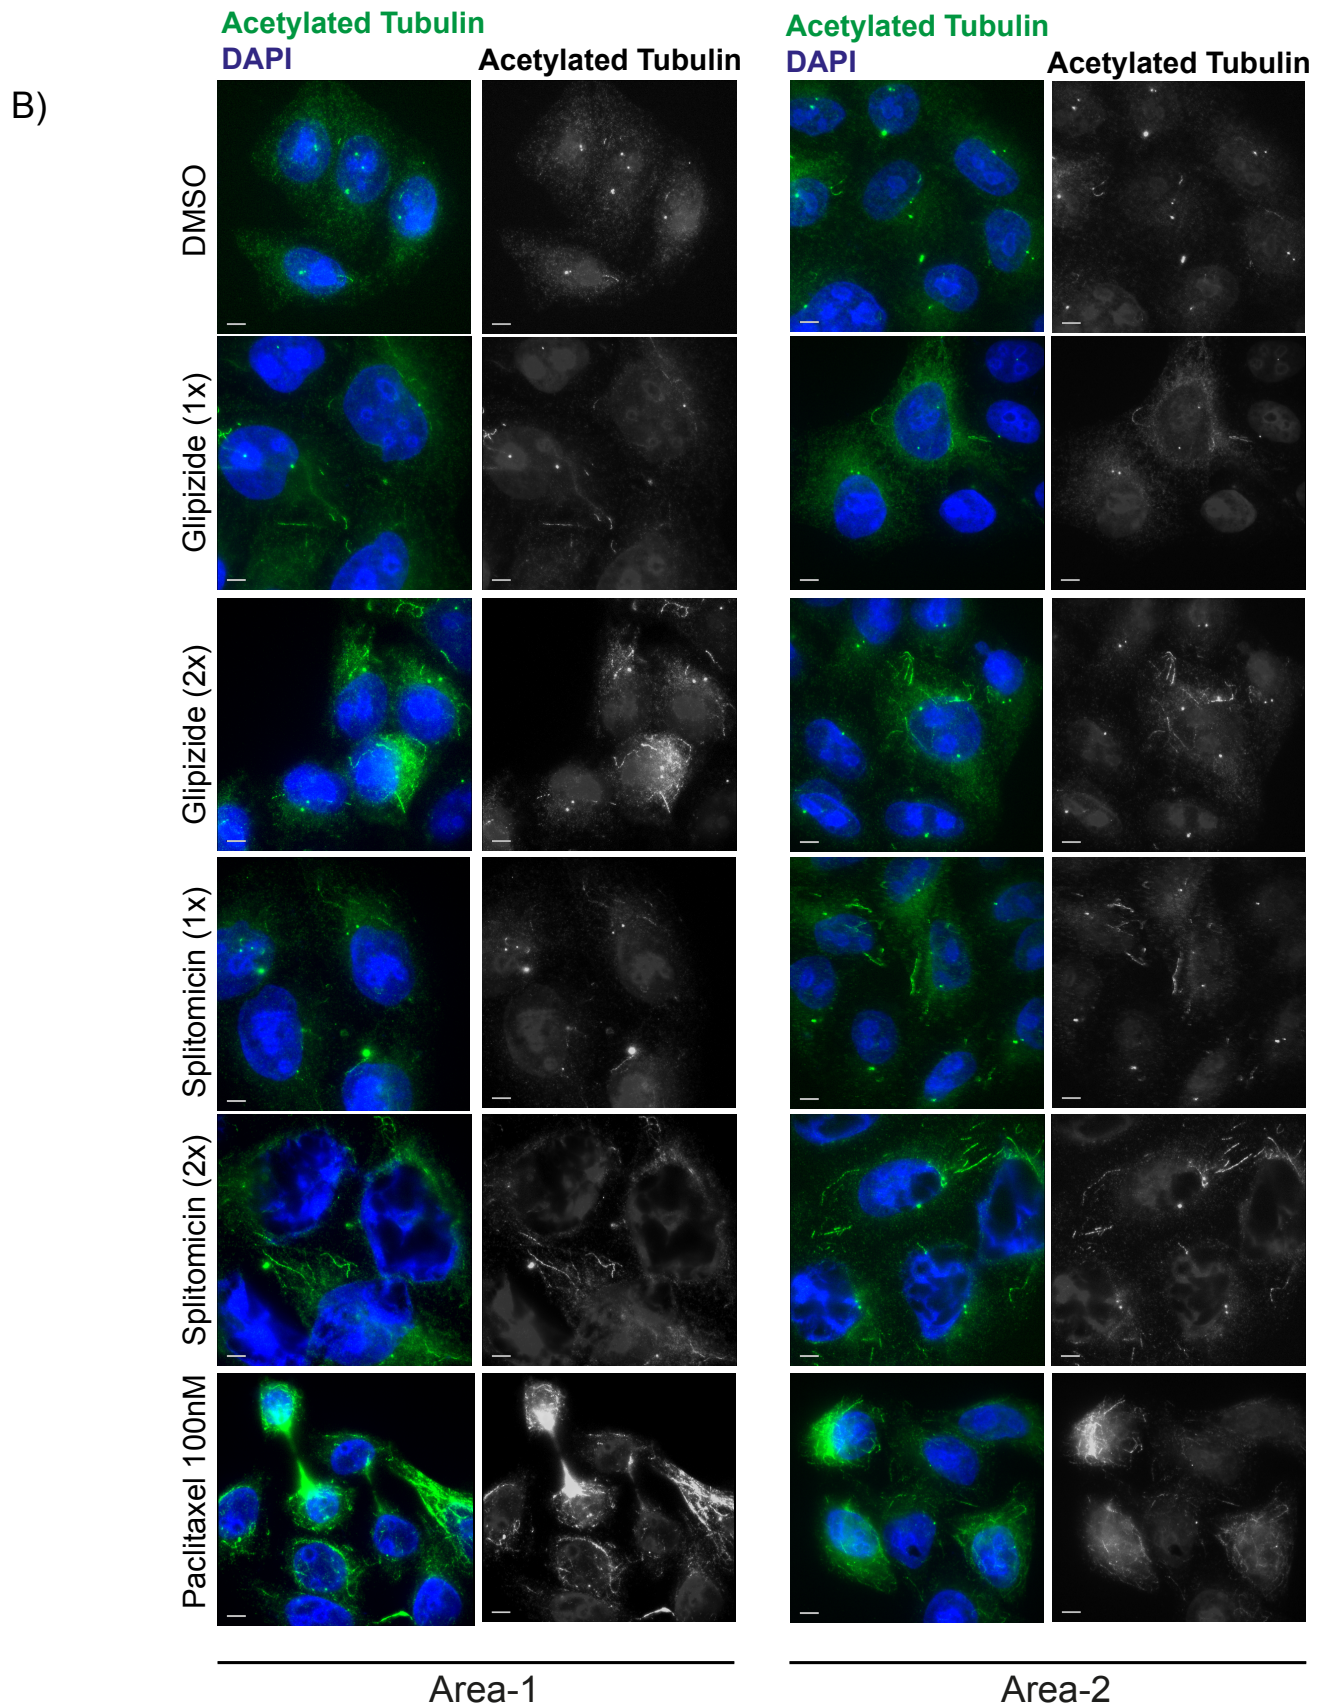

Supplement: pone.0139446.s002.pdf [file pone.0139446.s002.pdf]
