# Supplementary material for: A Semi-Supervised Approach for Refining Transcriptional Signatures of Drug Response and Repositioning Predictions
Source: PubMed Central journal article supplement (PMC4599732; doi:10.1371/journal.pone.0139446), 2015-10-09

### Paclitaxel/Proteasome-inhibitors Inconsistent Signature

**Negatively connected cell lines**

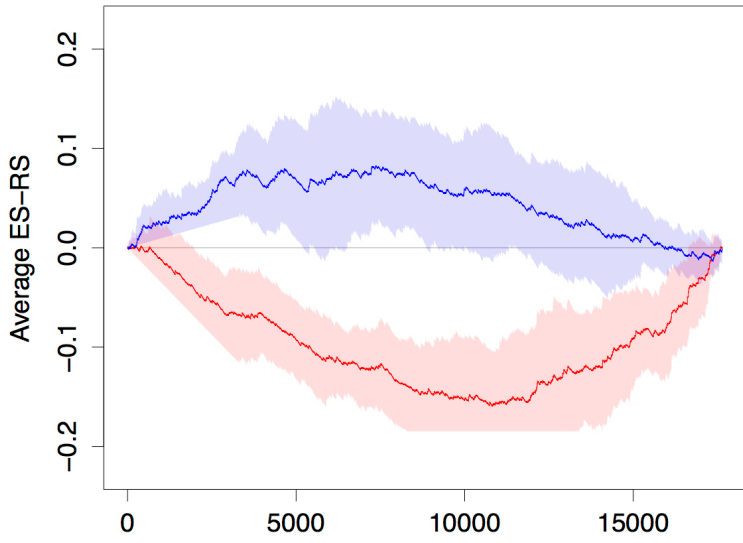

**Others**

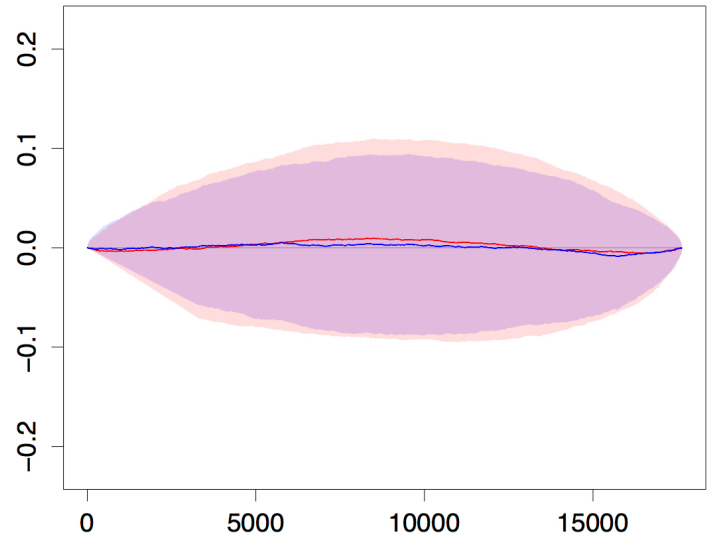

- Up-regulated part
- Down-regulated part
- Up-regulated part sd
- Down-regulated part sd

### Microtubule Stabilisation Signature

**Negatively connected cell lines**

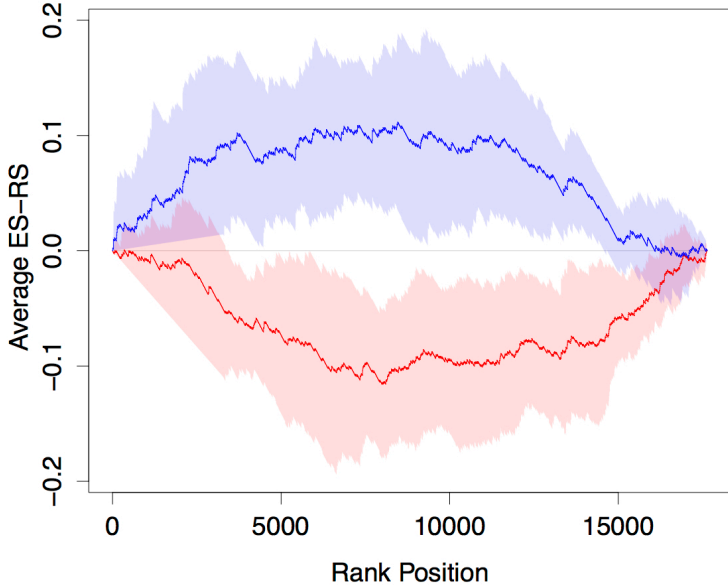

**Others**

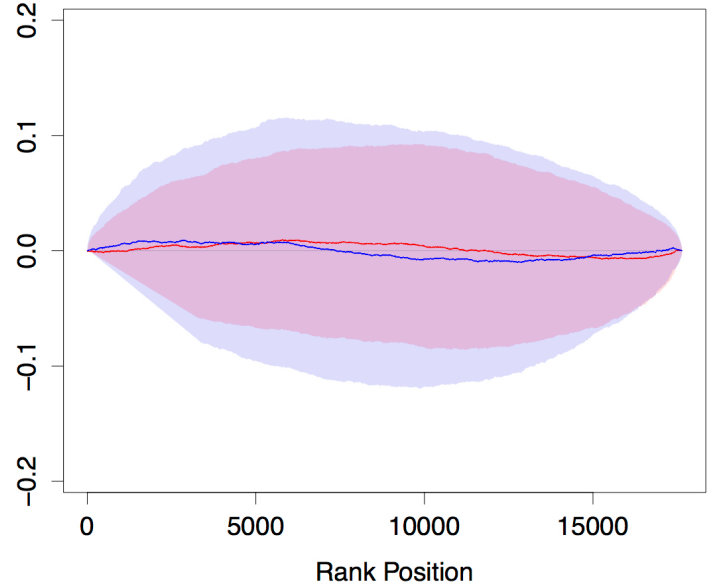

Supplement: pone.0139446.s004.pdf [file pone.0139446.s004.pdf]
