# Supplementary material for: A Semi-Supervised Approach for Refining Transcriptional Signatures of Drug Response and Repositioning Predictions
Source: PubMed Central journal article supplement (PMC4599732; doi:10.1371/journal.pone.0139446), 2015-10-09

paclitaxel optimal signature

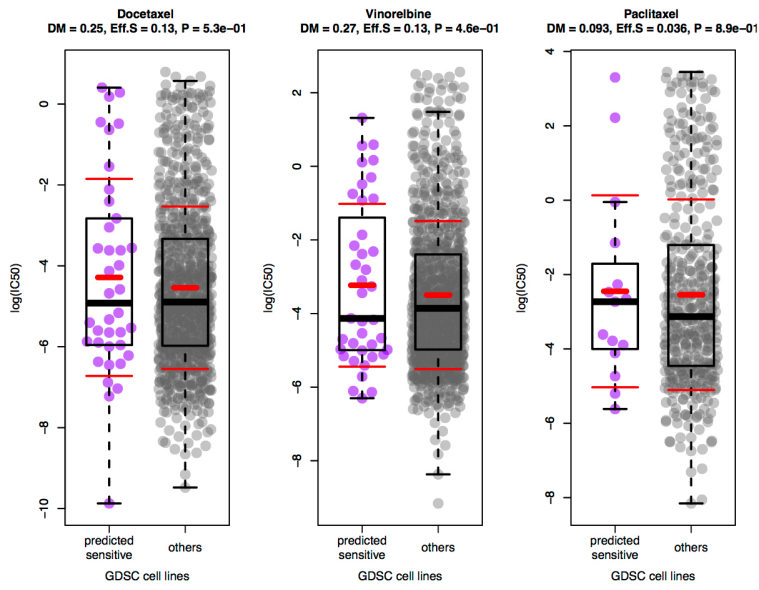

paclitaxel/proteasome inh. consistent signature

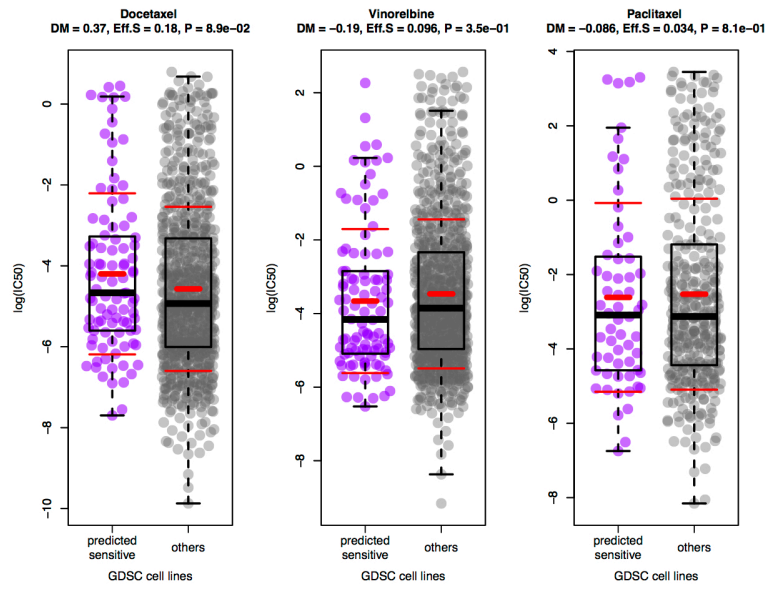

paclitaxel/proteasome inh. inconsistent signature

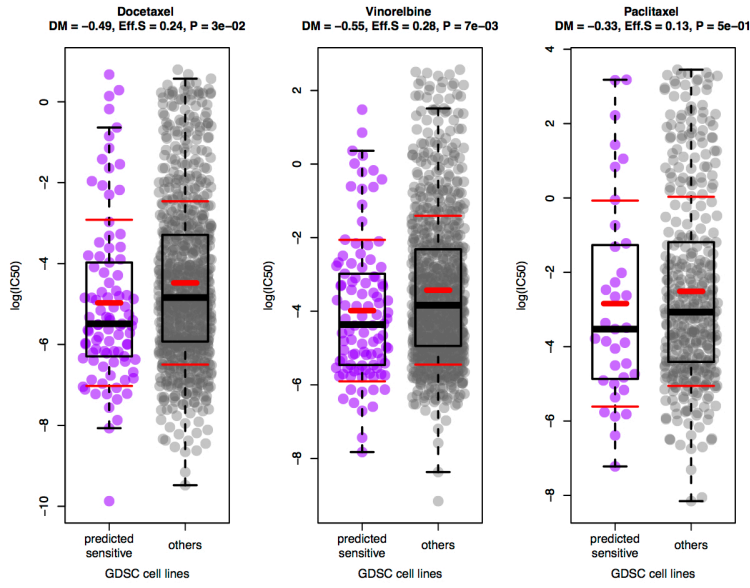

Microtubule stabilising signature

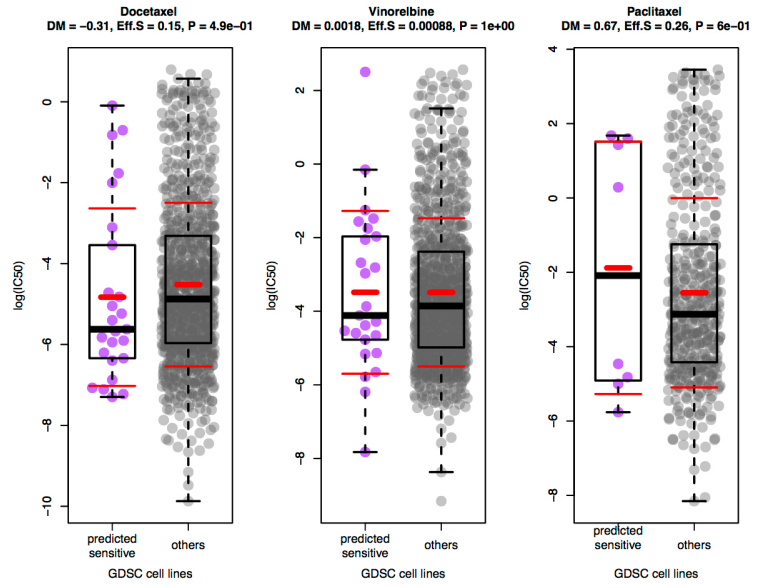

paclitaxel/proteasome inh. consistent + inconsistent signatures

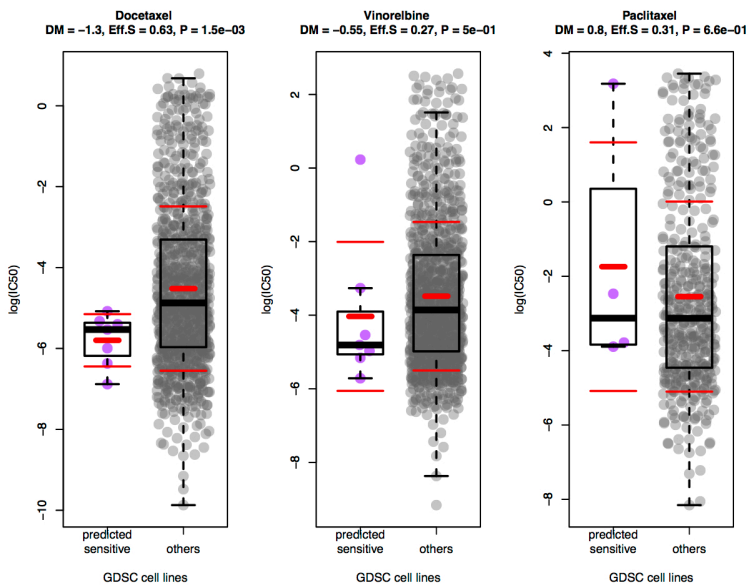

paclitaxel/proteasome inh. inconsistent + microtubule stabilising signature

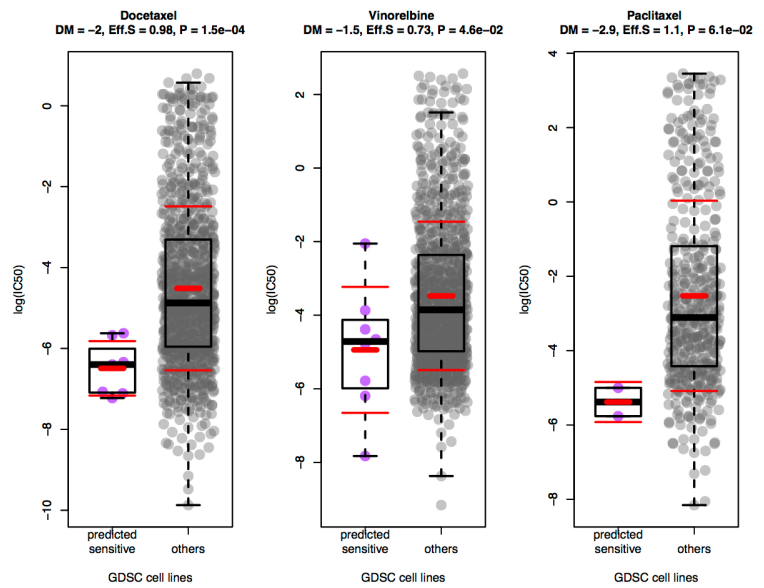

Supplement: pone.0139446.s006.pdf [file pone.0139446.s006.pdf]
