# Supplementary material for: A Semi-Supervised Approach for Refining Transcriptional Signatures of Drug Response and Repositioning Predictions
Source: PubMed Central journal article supplement (PMC4599732; doi:10.1371/journal.pone.0139446), 2015-10-09

## Signatures

- a = paclitaxel optimal
- b = paclitaxel/proteasome-inhibitors consistent
- c = paclitaxel/proteasome-inhibitors inconsistent
- d = microtubule stabilising

## Drugs

- docetaxel
- vinorelbine
- paclitaxel

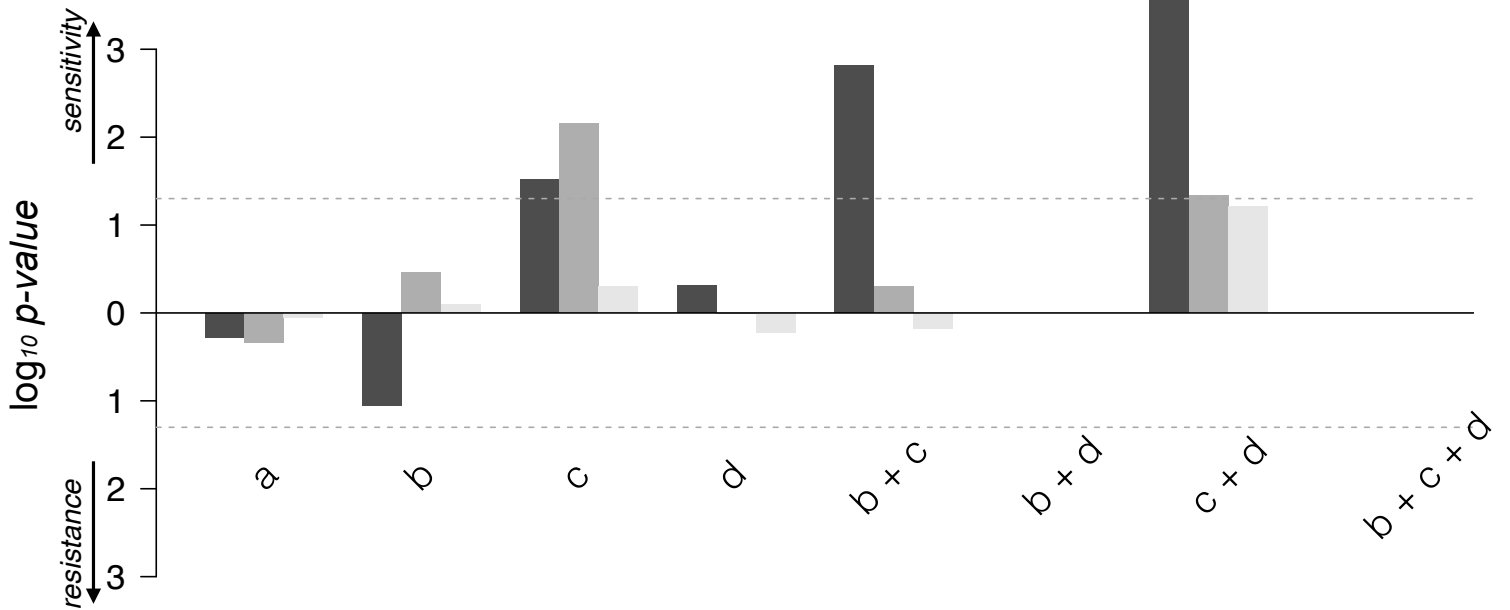

Supplement: pone.0139446.s007.pdf [file pone.0139446.s007.pdf]
